# Supplementary material for: Expression of squalene epoxidase and PRDM16 is high in breast cancer with adipose stroma
Source: Research Square preprint supplement (doi:10.21203/rs.3.rs-7377368/v1), 2025-09-23
Supplement: Supplementary file 1 [file 8c36dac6280394e9a7bba992.docx]

**Supplementary information**

**Figure 2A. Uncropped western blot images (Full blots)**


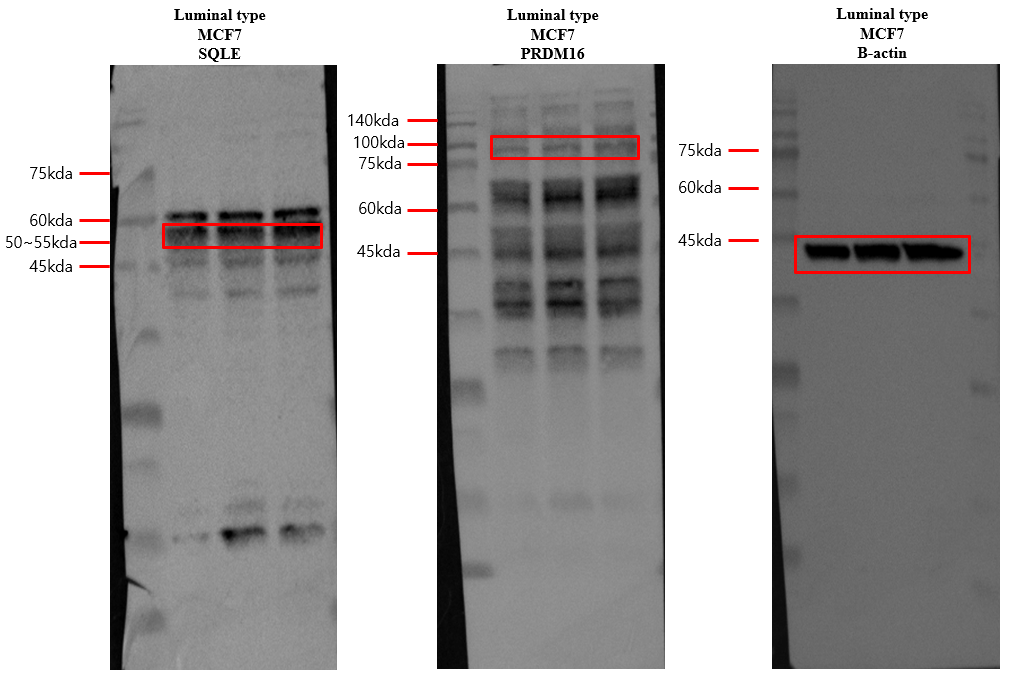


Figure 2A. Uncropped western blot images.

Full-length blots corresponding to the main figure are shown. Lanes represent MCF7 cells cultured under different conditions in the following order: control, co-culture with 3T3-L1, and co-culture with NIH-3T3. The red boxes indicate the regions displayed in the main figure.

**Figure 2B. Uncropped western blot images (Full blots)**


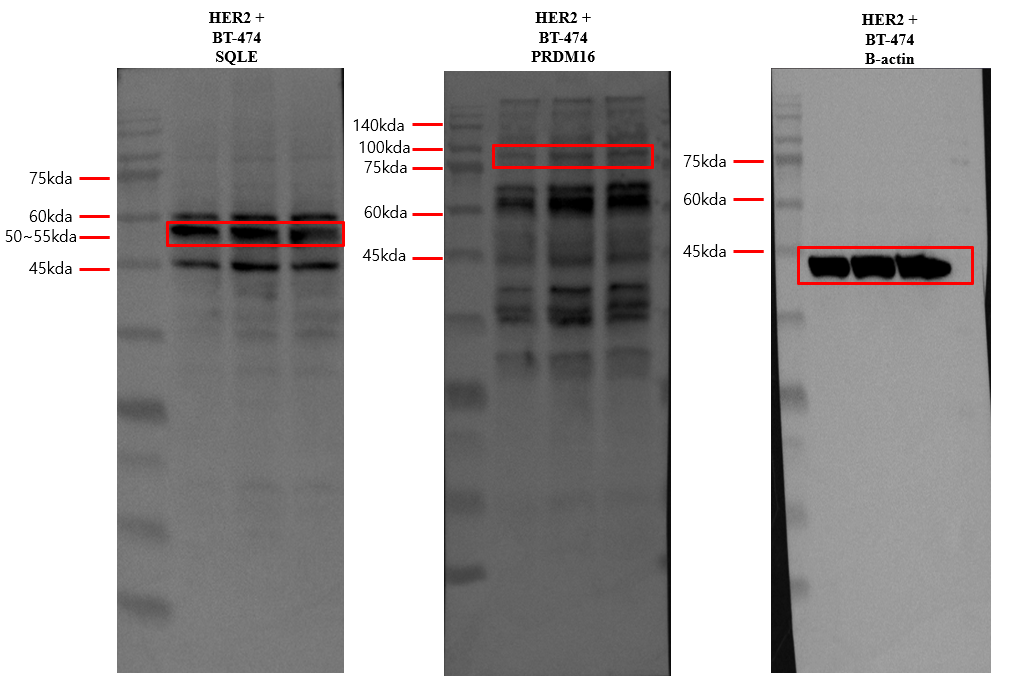


Figure 2B. Uncropped western blot images.

Full-length blots corresponding to the main figure are shown. Lanes represent BT-474 cells cultured under different conditions in the following order: control, co-culture with 3T3-L1, and co-culture with NIH-3T3. The red boxes indicate the regions displayed in the main figure.

**Figure 2C. Uncropped western blot images (Full blots)**


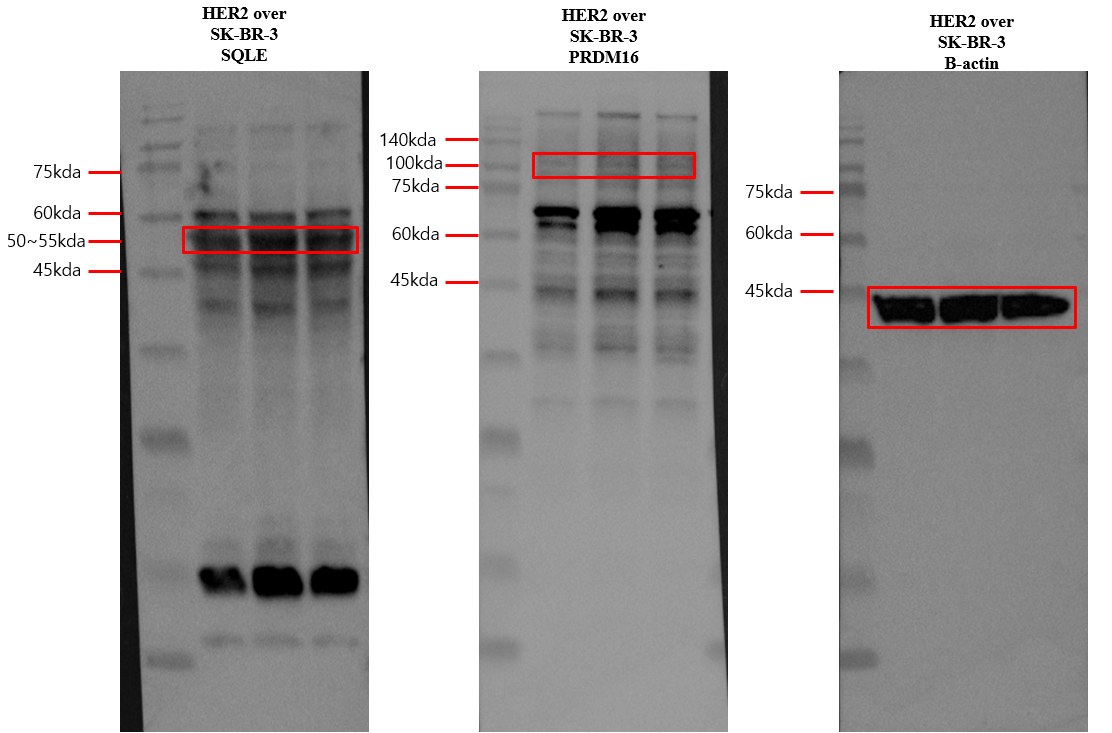


Figure 2C. Uncropped western blot images.

Full-length blots corresponding to the main figure are shown. Lanes represent SK-BR-3 cells cultured under different conditions in the following order: control, co-culture with 3T3-L1, and co-culture with NIH-3T3. The red boxes indicate the regions displayed in the main figure.

**Figure 2D. Uncropped western blot images (Full blots)**


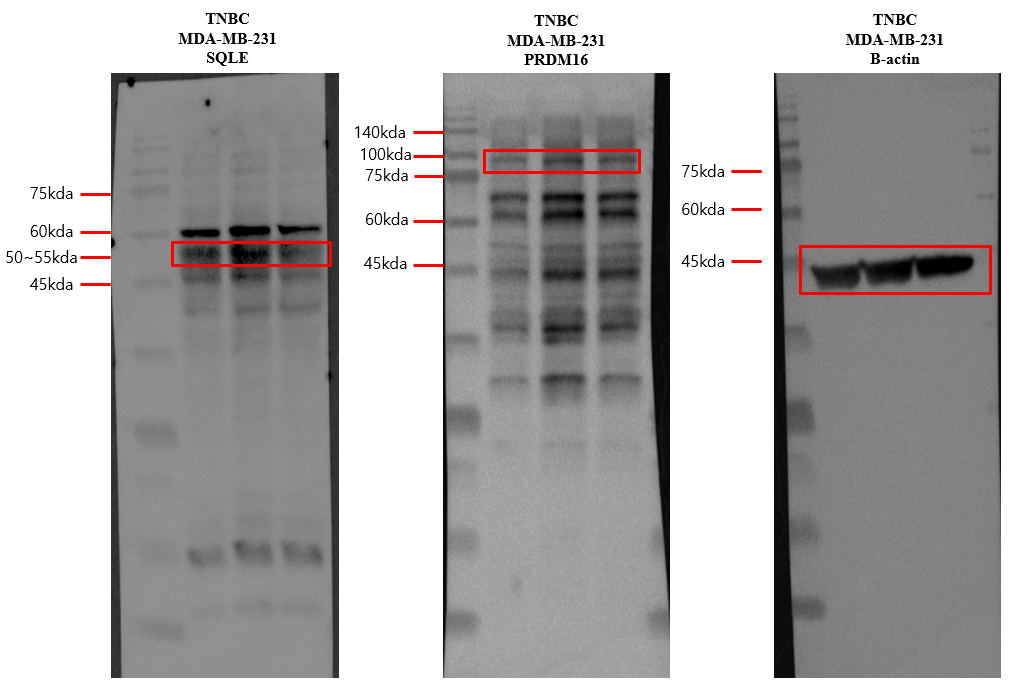
 Figure 2D. Uncropped western blot images.

Full-length blots corresponding to the main figure are shown. Lanes represent MDA-MB-231 cells cultured under different conditions in the following order: control, co-culture with 3T3-L1, and co-culture with NIH-3T3. The red boxes indicate the regions displayed in the main figure.
